# Supplementary material for: Coverage and beliefs about temephos application for control of dengue vectors and impact of a community-based prevention intervention: secondary analysis from the Camino Verde trial in Mexico
Source: PubMed Central journal article supplement (PMC5506576; doi:10.1186/s12889-017-4297-5), 2017-05-30
Supplement: 12889_2017_4297_MOESM1_ESM.pdf [file 12889_2017_4297_MOESM1_ESM.pdf]

**Additional file 1. Coverage estimated from government figures for visits by temephos programme, and survey estimates of coverage, 2012**

| Region       | 2010 census figures |           | Government programme figures (Jan-Dec) |                              |                | Survey figures (% of hh) |                   |
|--------------|---------------------|-----------|----------------------------------------|------------------------------|----------------|--------------------------|-------------------|
|              | Population          | No. hh*   | No. visits                             | Proportion of hh visited (%) |                | Visited within last 12m  | Temephos observed |
|              |                     |           |                                        | If 1 visit/hh                | If 3 visits/hh |                          |                   |
| Costa Grande | 413,793.0           | 82,758.6  | <b>45,655</b>                          | 55.2                         | 18.4           | 68.1                     | 18.7              |
| Costa Chica  | 428,501.0           | 85,700.2  | <b>14,012</b>                          | 16.4                         | 5.5            | 64.0                     | 23                |
| Acapulco     | 789,971.0           | 197,492.8 | <b>221,561</b>                         | 112.2                        | 37.4           | 69.5                     | 21.7              |
| Total        |                     | 365,951.6 | <b>281,228</b>                         | 76.8                         | 25.6           | 67.1                     | 20.6              |

\* Based on estimated household size =5 in Costa Grande and Costa Chica and =4 in Acapulco

The figures in **bold** are from the government programme database, from 1 January to 31 December 2012

hh= household
